# Supplementary material
Source: PubMed Central journal article supplement (PMC4510319)

**Appendix S1** Biodiversity, Governance, Wealth and Scientific Capacity indices for world countries and raw variables used to construct each indicator (see details in Materials and Methods).

**Table S1** Proportion of variance explained by the first principal component in each of the five indicators.

| Indicator            | Explained variance in PC 1 |
|----------------------|----------------------------|
| Biodiversity         | 75.09                      |
| AC biodiversity      | 56.07                      |
| Capacity with GEF    | 34.67                      |
| Capacity without GEF | 55.28                      |
| Wealth               | 55.74                      |
| Governance           | 86.69                      |

**Table S2** Loadings from principal component analysis of the Biodiversity index.

|                     | PC 1  | PC 2  | PC 3  | PC 4  |
|---------------------|-------|-------|-------|-------|
| Amphibians richness | 0.272 | 0.103 | 0.245 | 0.380 |
| Reptiles richness   | 0.171 | 0.817 | 0.010 | 0.002 |
| Birds richness      | 0.276 | 0.024 | 0.681 | 0.019 |
| Mammals richness    | 0.282 | 0.055 | 0.064 | 0.599 |

**Table S3** Loadings from principal component analysis of the Area-Corrected Biodiversity index

|                     | PC 1  | PC 2  | PC 3  | PC 4  |
|---------------------|-------|-------|-------|-------|
| Amphibians richness | 0.252 | 0.314 | 0.013 | 0.419 |
| Reptiles richness   | 0.189 | 0.547 | 0.128 | 0.134 |
| Birds richness      | 0.273 | 0.050 | 0.558 | 0.117 |
| Mammals richness    | 0.284 | 0.087 | 0.300 | 0.328 |

**Table S4** Loadings from principal component analysis of the Governance index.

|                                     | PC 1   | PC 2   | PC 3   | PC 4   | PC 5   |
|-------------------------------------|--------|--------|--------|--------|--------|
| Voice and accountability            | -0.203 | -0.830 | 1.507  | -0.353 | 0.108  |
| Political stability and no violence | -0.198 | 1.462  | 0.608  | 0.231  | 0.738  |
| Government effectiveness            | -0.223 | -0.360 | -0.666 | 2.917  | 2.982  |
| Rule of law                         | -0.227 | -0.052 | -0.481 | 0.762  | -5.043 |
| Control of corruption               | -0.223 | -0.129 | -0.755 | -3.575 | 1.394  |

**Table S5** Loadings from principal component analysis of the Capacity GEF index.

|                                         | PC 1  | PC 2   | PC 3   | PC 4   | PC 5   | PC 6   | PC 7   | PC 8   |
|-----------------------------------------|-------|--------|--------|--------|--------|--------|--------|--------|
| Num. of sci. articles <i>per capita</i> | 0.307 | 0.790  | -0.222 | -0.186 | 0.182  | 0.193  | 0.356  | -0.030 |
| GBIF records (own to total)             | 0.378 | 0.619  | 0.148  | -0.559 | -0.266 | -0.075 | -0.251 | 0.009  |
| Num. of herbaria                        | 0.886 | -0.218 | -0.246 | 0.141  | -0.098 | 0.115  | -0.111 | -0.227 |
| Num. of specimens in herbaria           | 0.879 | -0.107 | -0.292 | 0.169  | -0.095 | 0.203  | -0.072 | 0.214  |
| Internet penetration                    | 0.302 | 0.716  | -0.065 | 0.429  | 0.279  | -0.336 | -0.130 | 0.007  |
| Num. of GEF grants                      | 0.751 | -0.347 | 0.208  | -0.070 | -0.217 | -0.366 | 0.294  | 0.018  |
| Co-financing to GEF                     | 0.513 | -0.414 | 0.281  | -0.305 | 0.622  | 0.020  | -0.075 | 0.011  |
| Sites for ecological studies            | 0.246 | 0.277  | 0.843  | 0.301  | -0.099 | 0.226  | 0.023  | -0.009 |

**Table S6** Loadings from principal component analysis of the Capacity no GEF index.

|                                         | PC 1   | PC 2   | PC 3   | PC 4   | PC 5   | PC 6   |
|-----------------------------------------|--------|--------|--------|--------|--------|--------|
| Num. of sci. articles <i>per capita</i> | -0.843 | -0.357 | 0.153  | -0.153 | 0.334  | -0.063 |
| GBIF records (own to total)             | -0.848 | -0.197 | 0.178  | -0.370 | -0.270 | -0.006 |
| Num. of herbaria                        | -0.609 | 0.753  | -0.053 | 0.078  | -0.021 | -0.229 |
| Num. of specimens in herbaria           | -0.728 | 0.636  | 0.000  | -0.010 | 0.067  | 0.247  |
| Internet penetration                    | -0.755 | -0.334 | 0.265  | 0.489  | -0.092 | 0.017  |
| Sites for ecological studies            | -0.643 | -0.313 | -0.696 | 0.052  | -0.029 | 0.009  |

**Table S7** Loadings from principal component analysis of the Wealth index.

|                                          | PC 1  | PC 2   |
|------------------------------------------|-------|--------|
| Gross domestic product                   | 0.670 | 0.752  |
| Gross domestic product <i>per capita</i> | 0.670 | -0.752 |

**Fig. S1** Scatterplot of global area-corrected biodiversity and four indices, presented by region.

AM = Americas, AP = Asia Pacific, CA = Caribbean, EU\_CA = Eastern Europe and Central

Asia, EU = Europe, ME\_NA = Middle East and North Africa, SS\_A = Sub Saharan Africa.

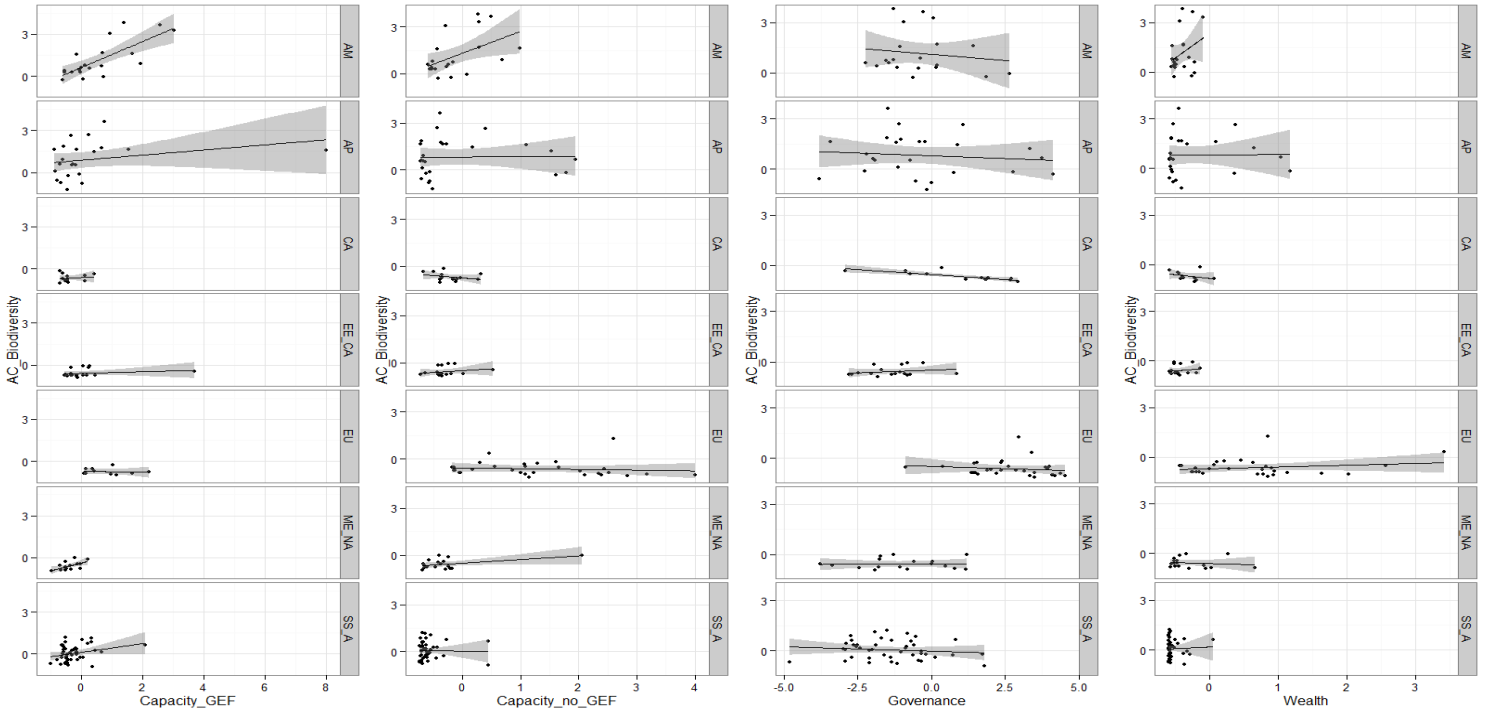

Supplement: 13280_2014_581_MOESM1_ESM.pdf [file 13280_2014_581_MOESM1_ESM.pdf]
